# Supplementary material for: The Genus Broussonetia: An Updated Review of Phytochemistry, Pharmacology and Applications
Source: MDPI journal article supplement (doi:10.3390/molecules27165344), 2022-08-22

**Figure S1.** Chemical structures of the Flavonoids in *Broussonetia* species.

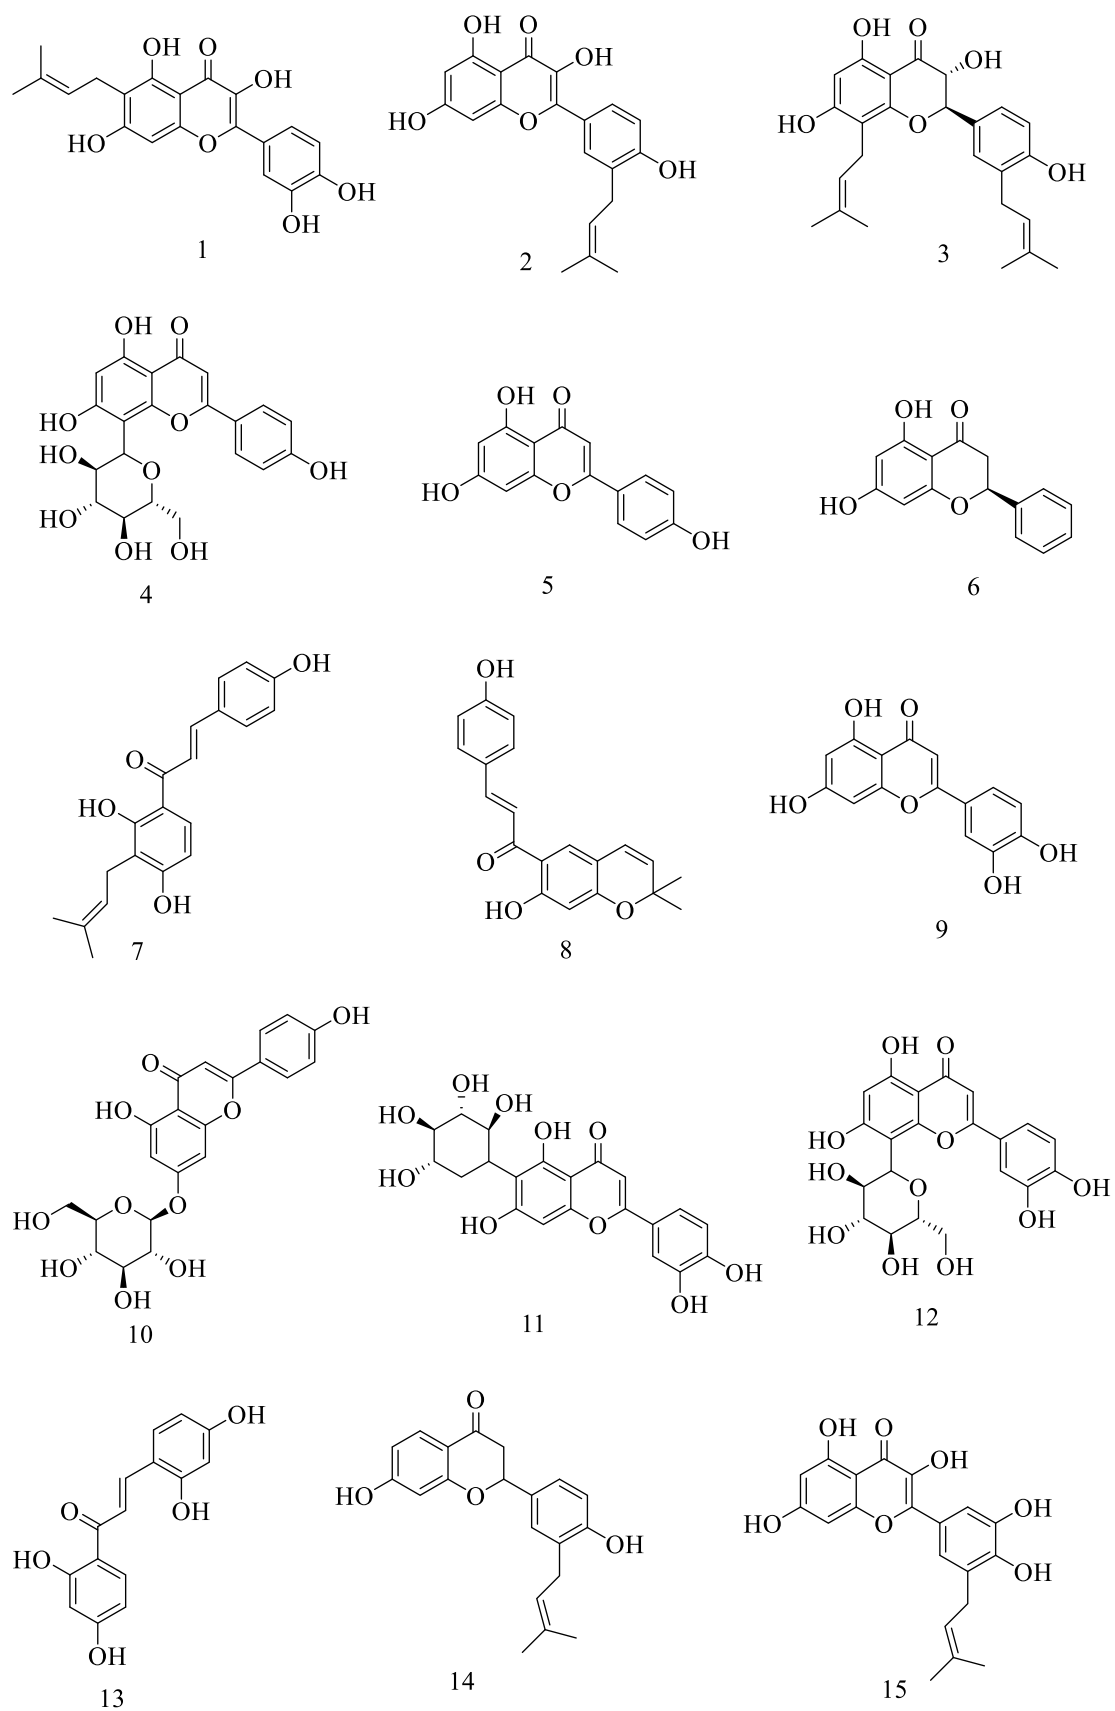

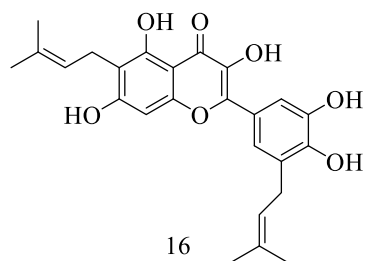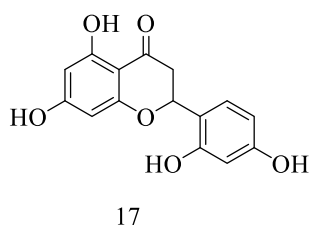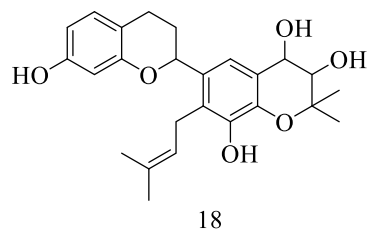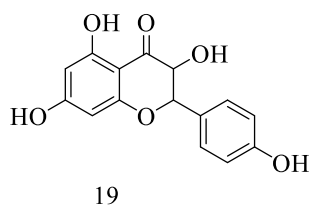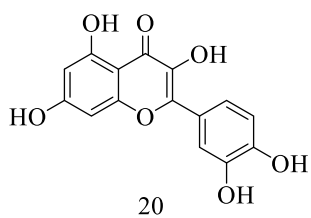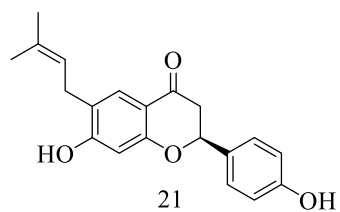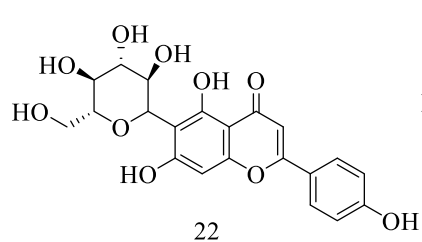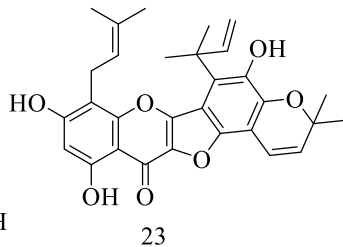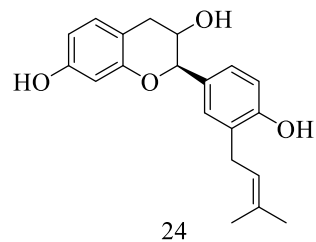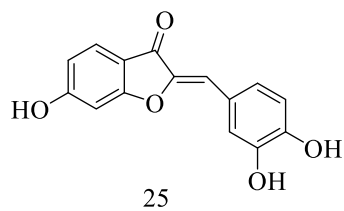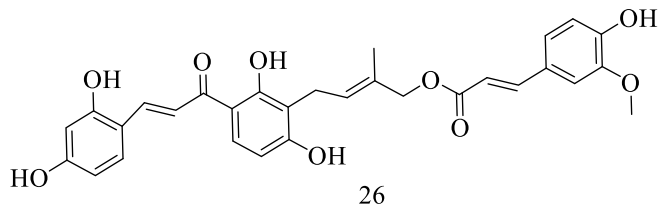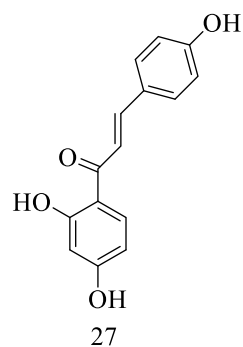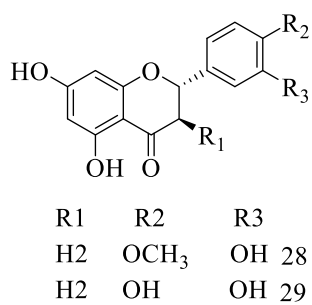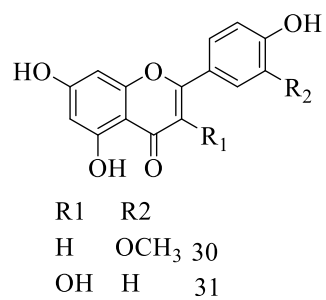

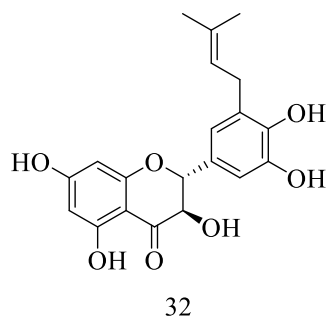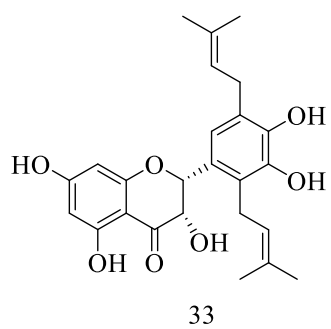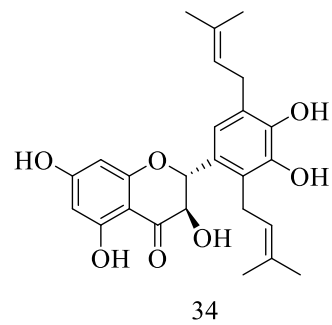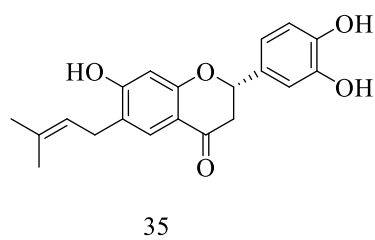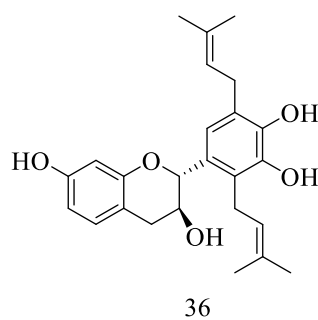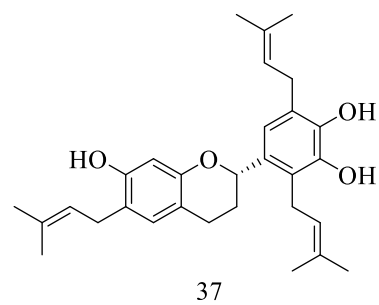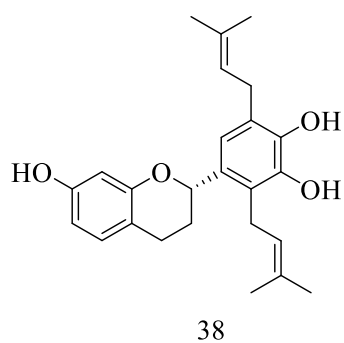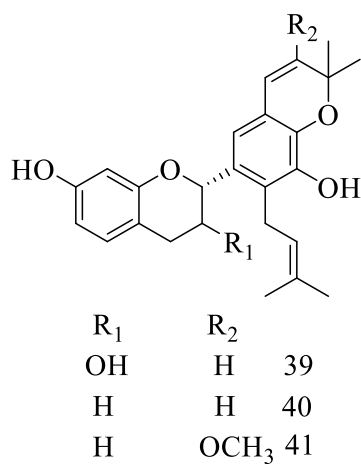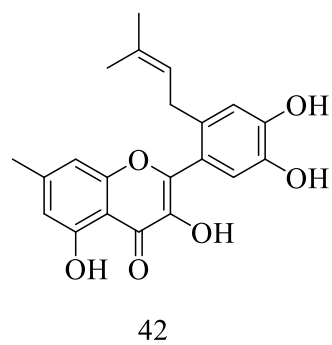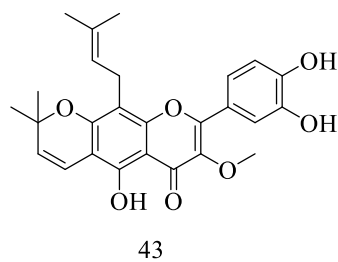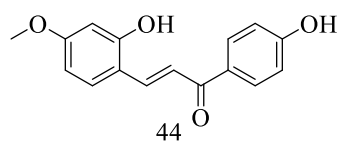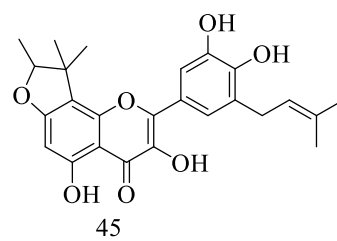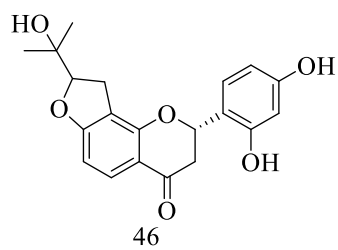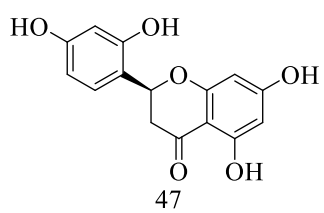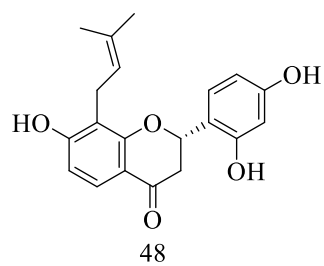

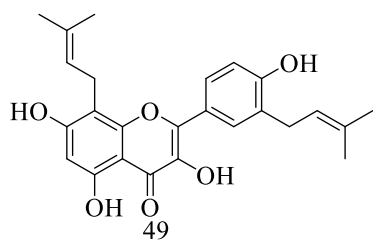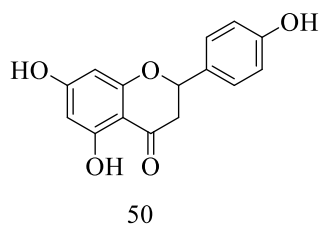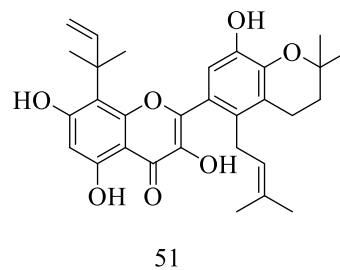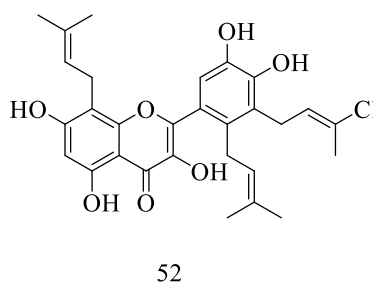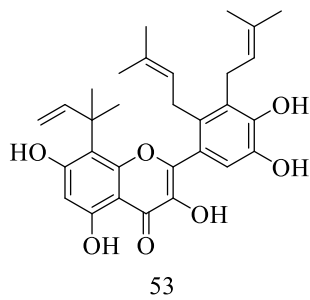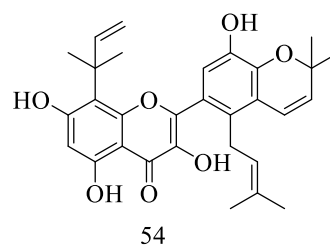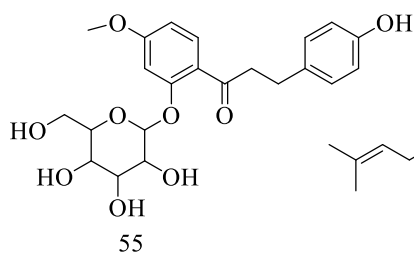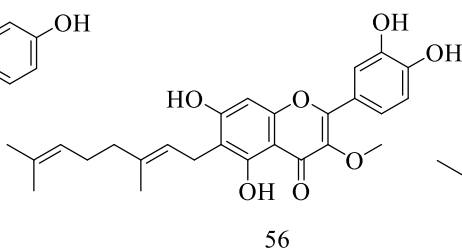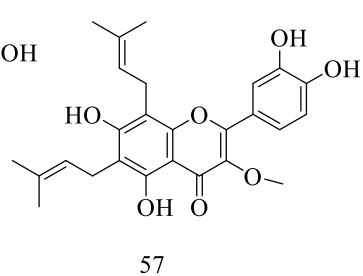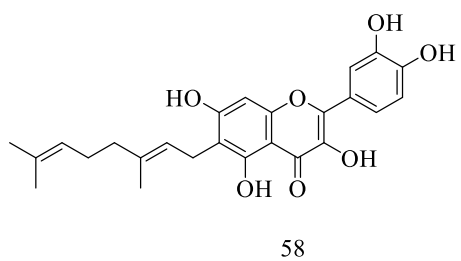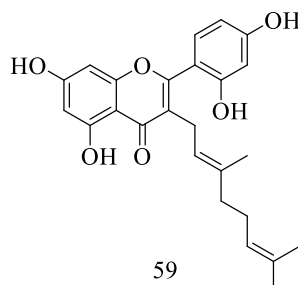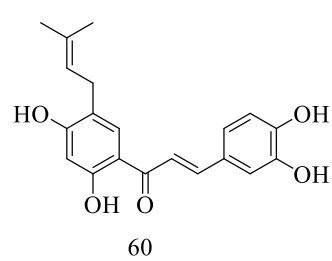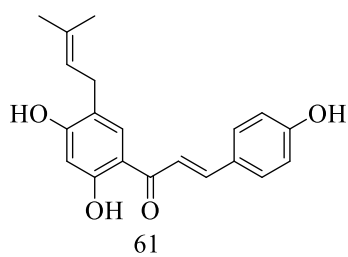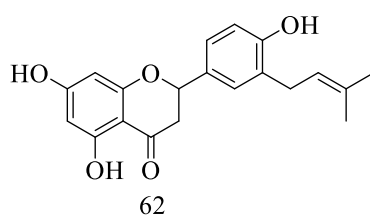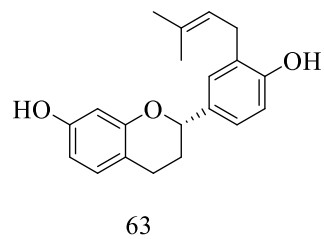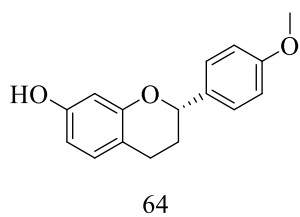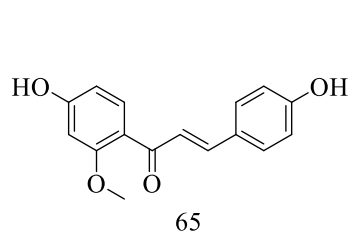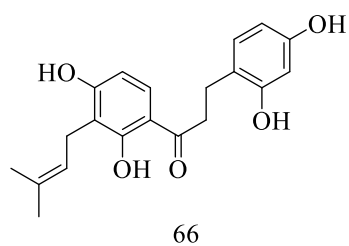

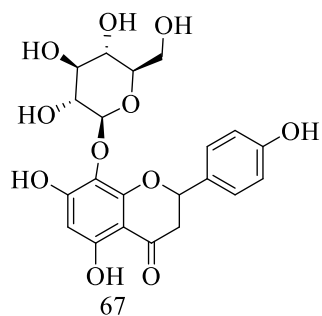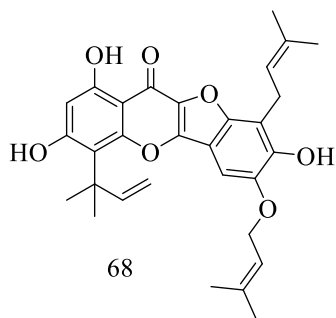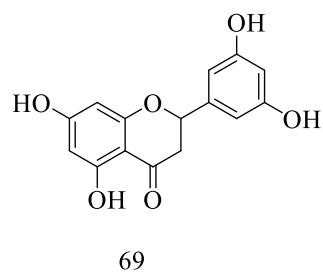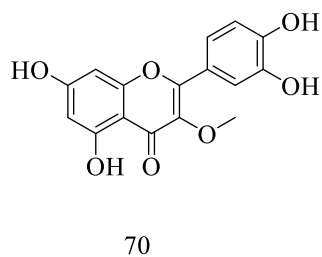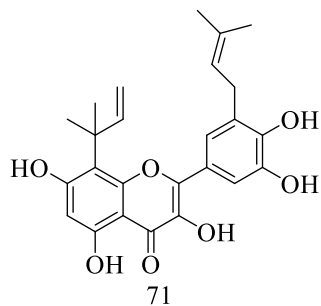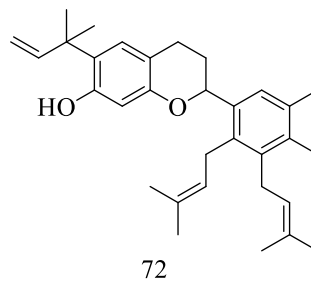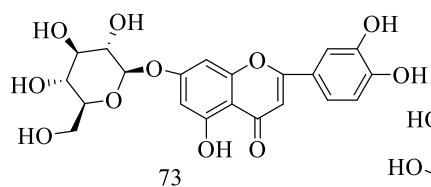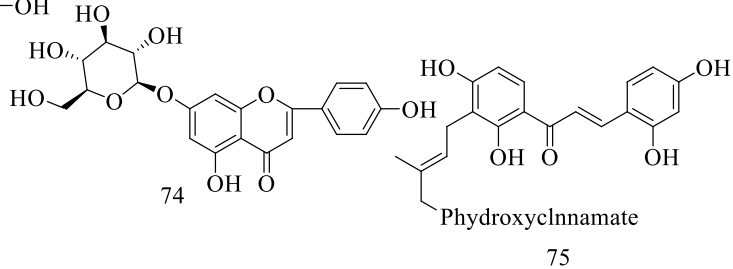

Phydioxycinnamate  
75

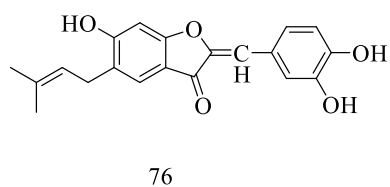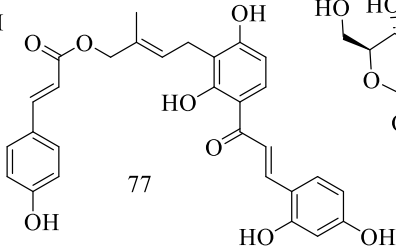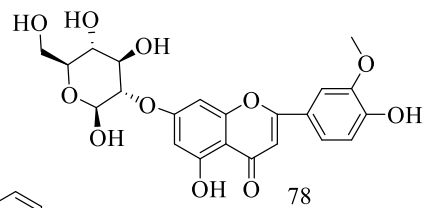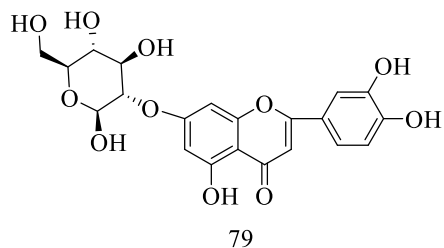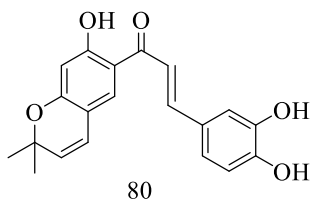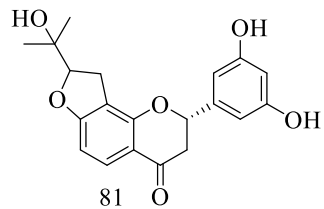

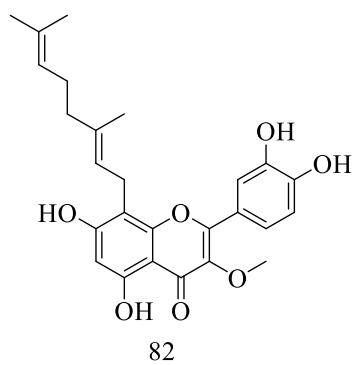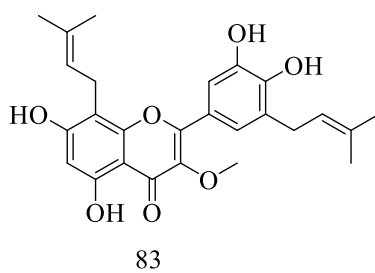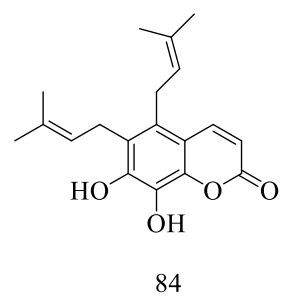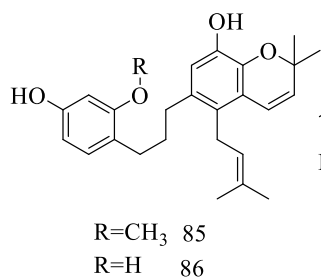

R=H 86

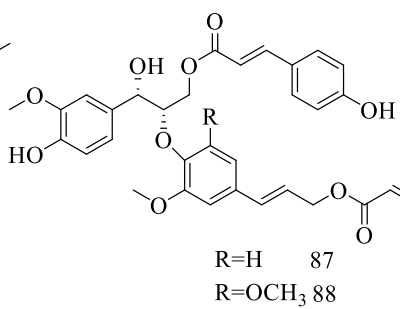

R=OCH<sub>3</sub> 88

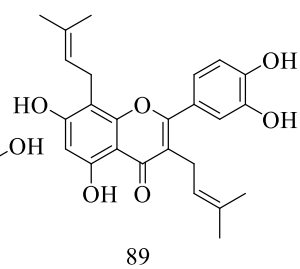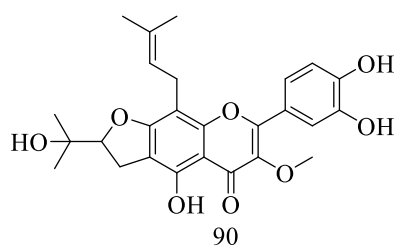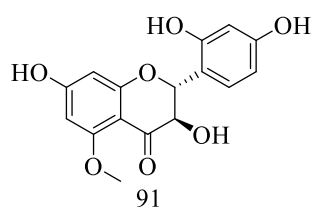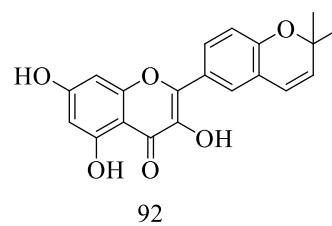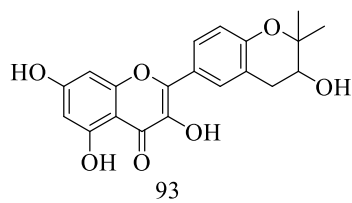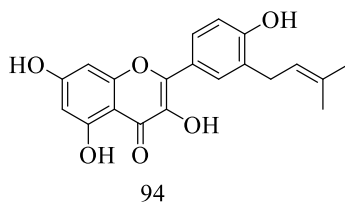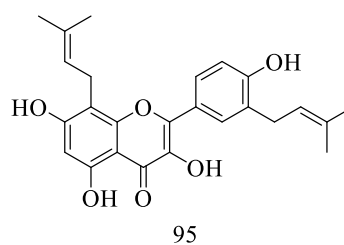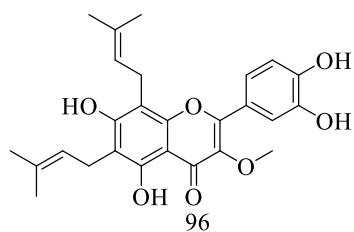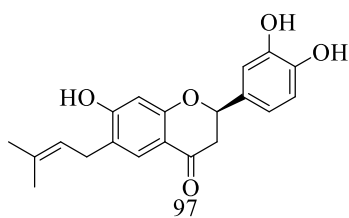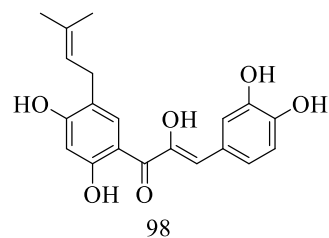

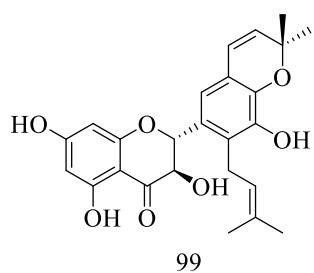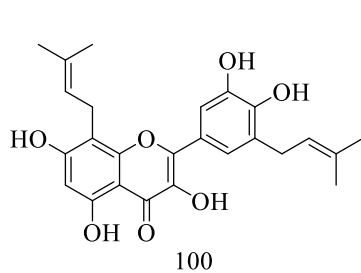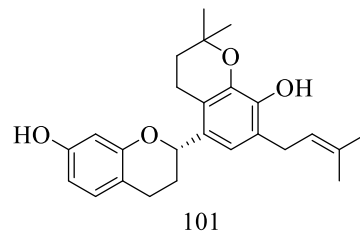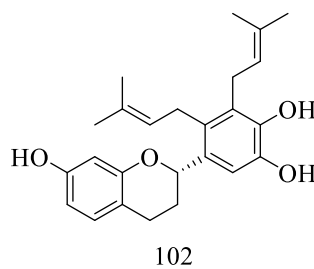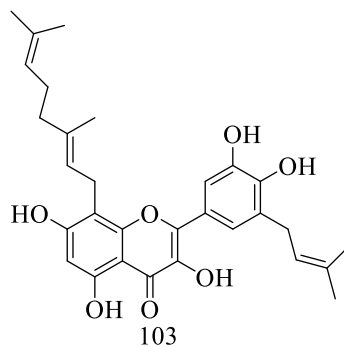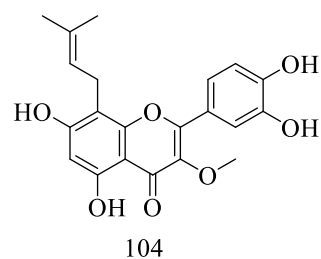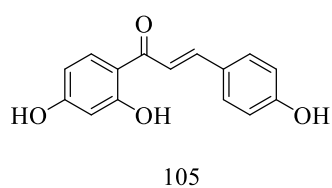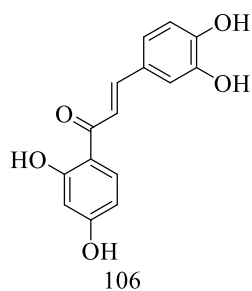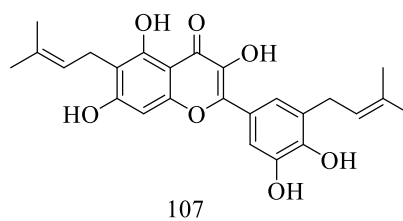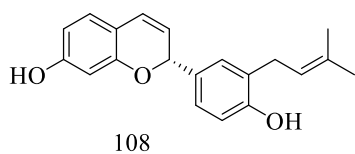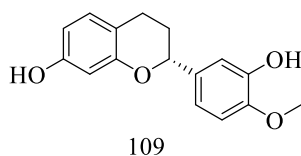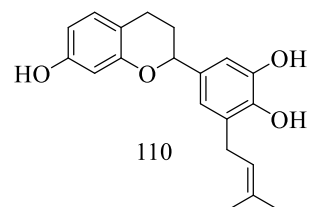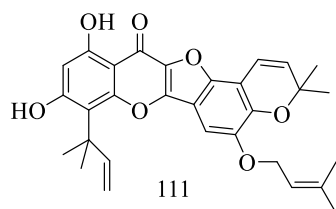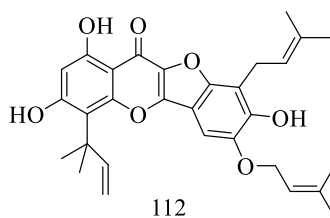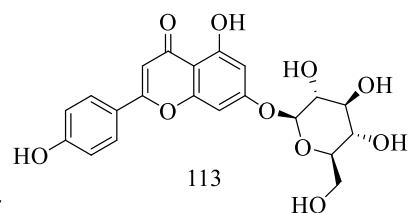

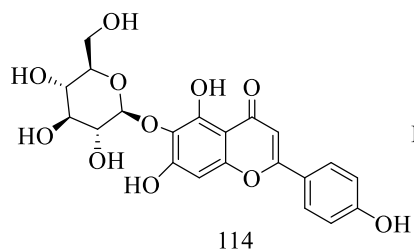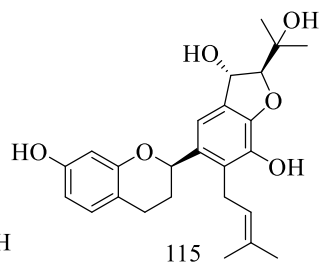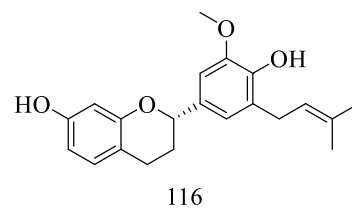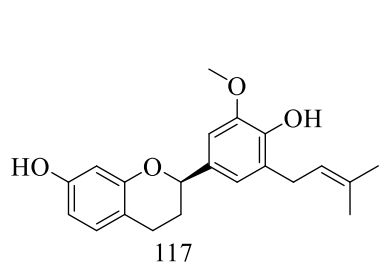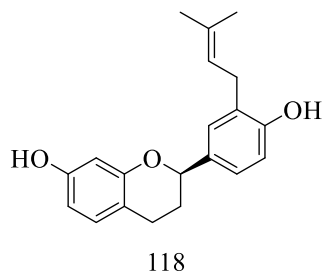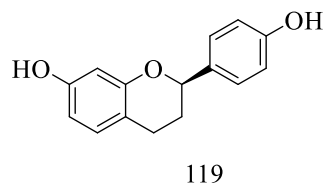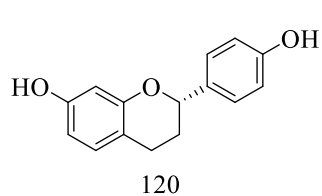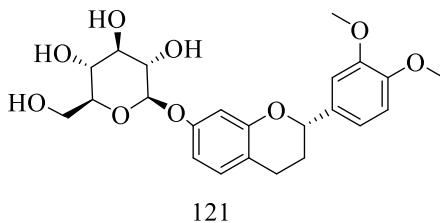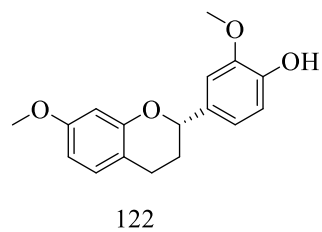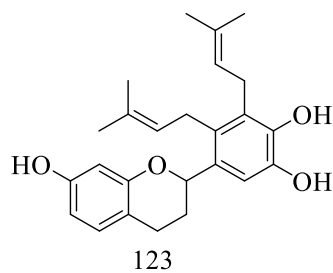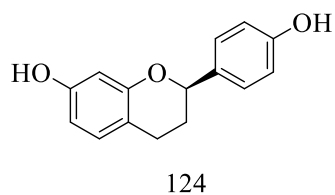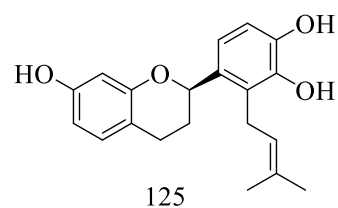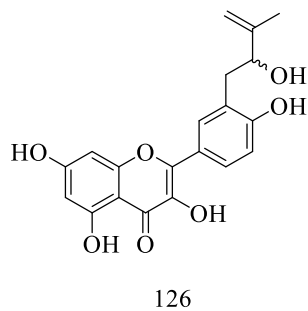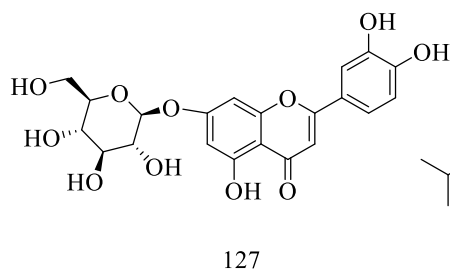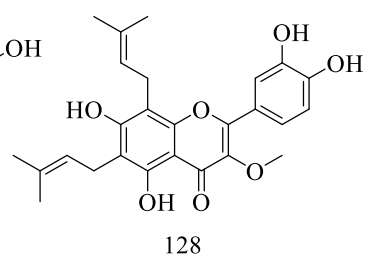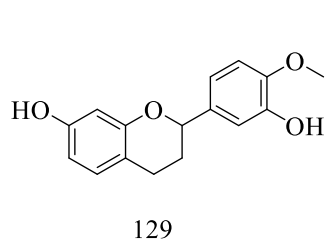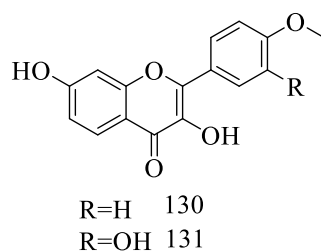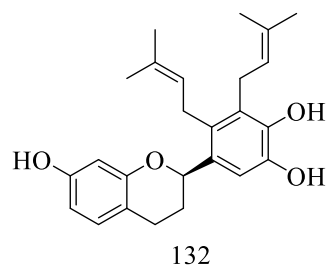



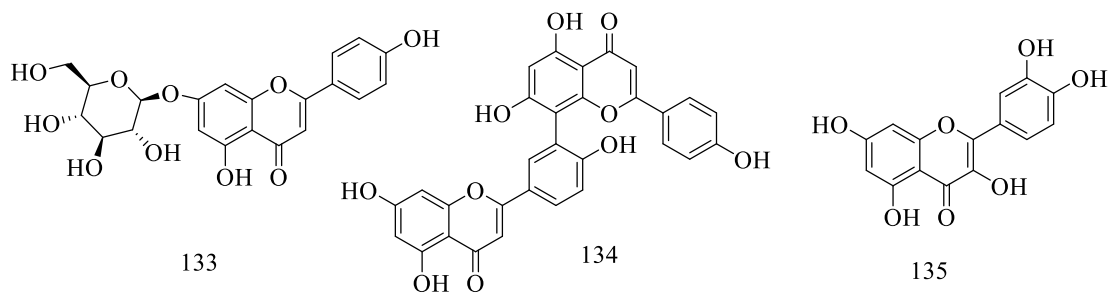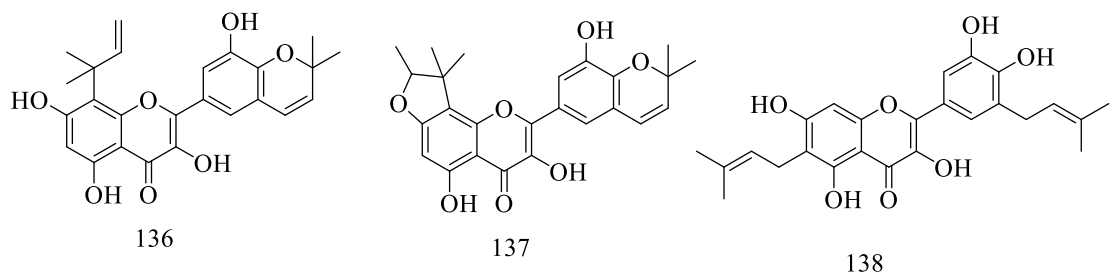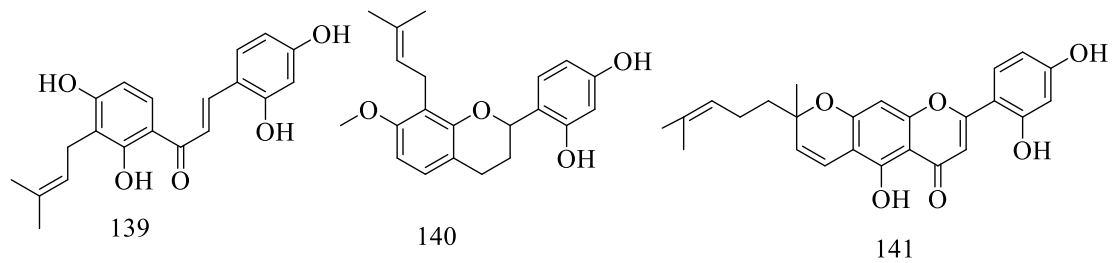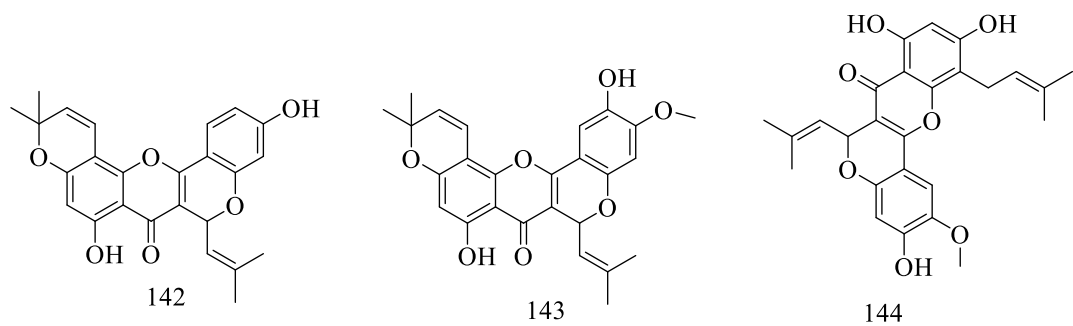

**Figure S2.** Chemical structures of the Penylpropanoids in *Broussonetia* species.

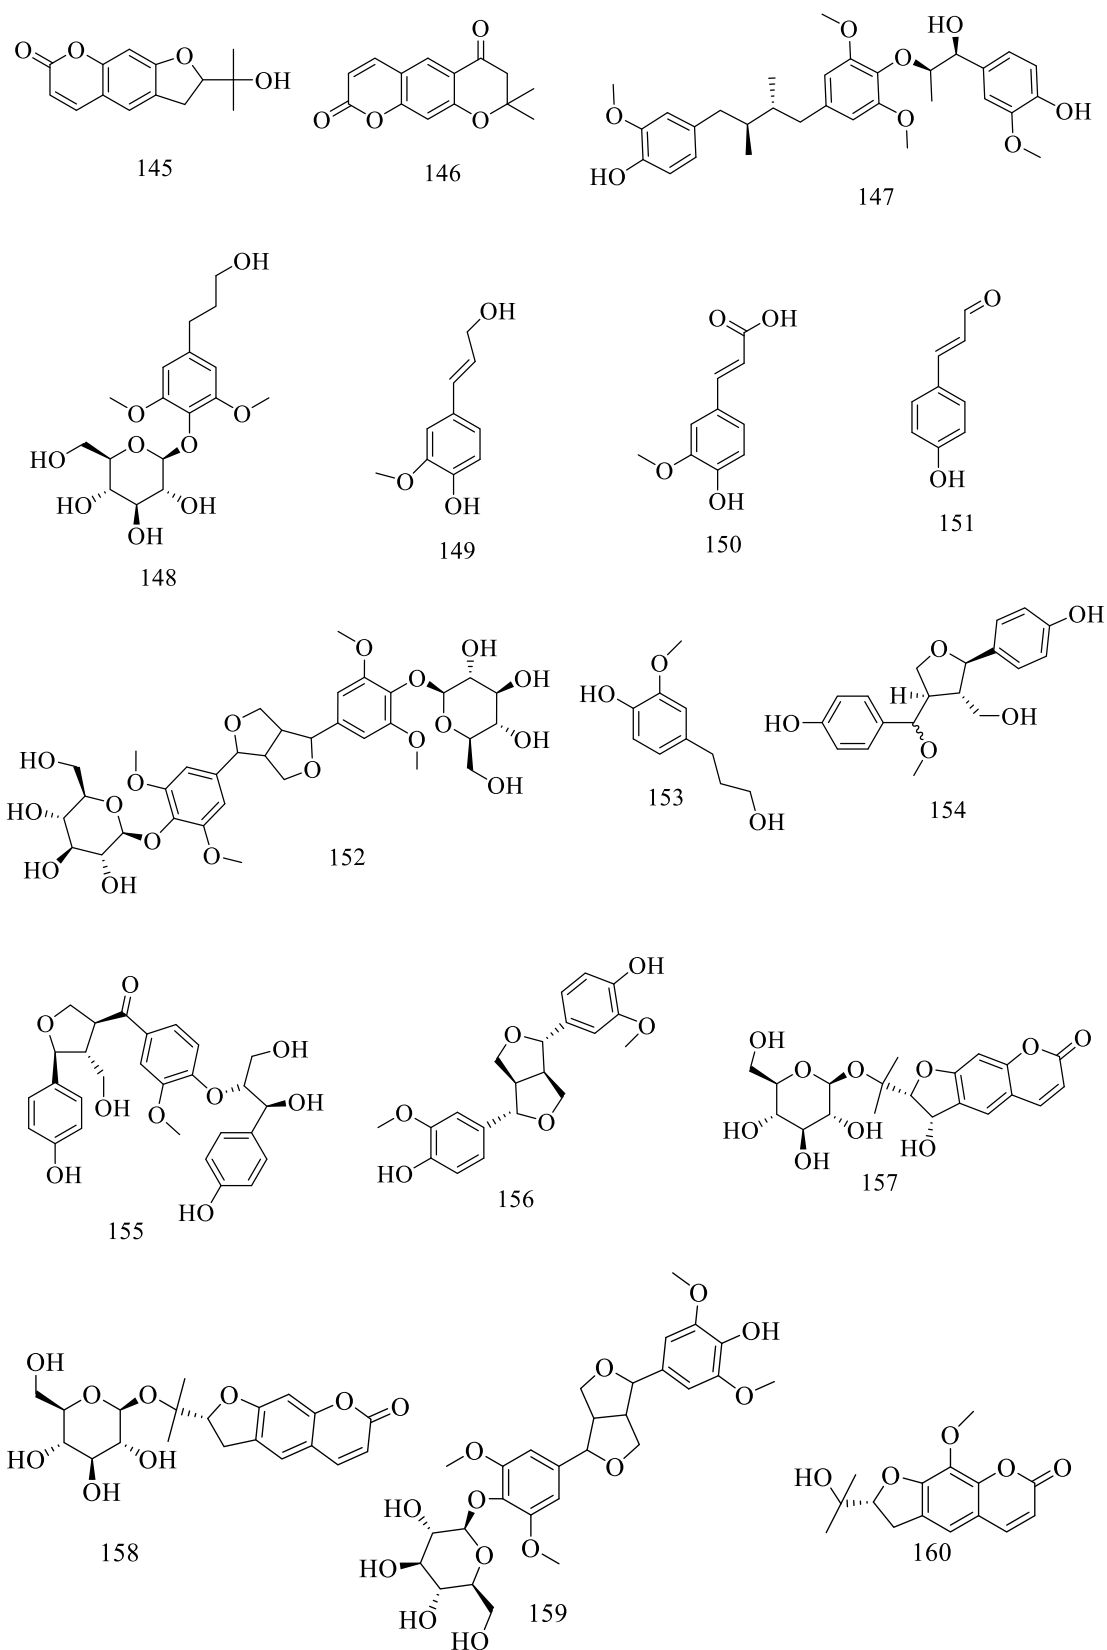

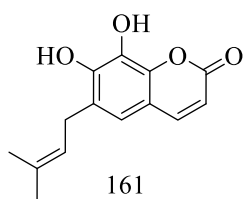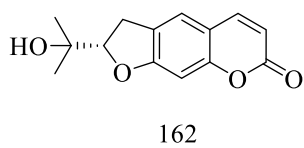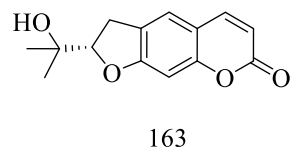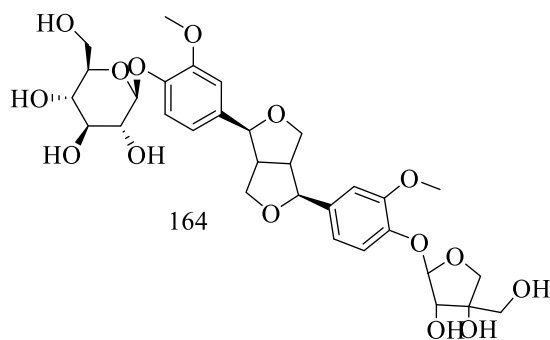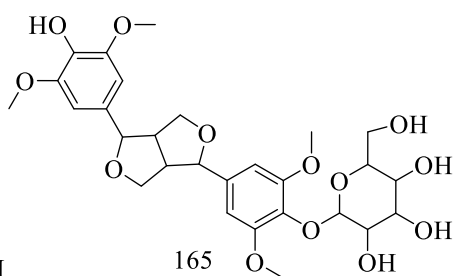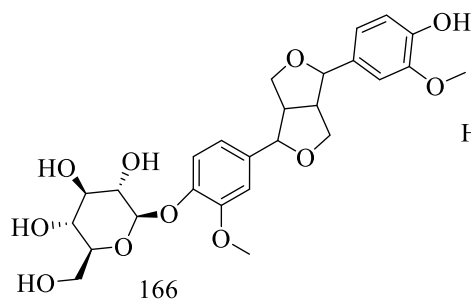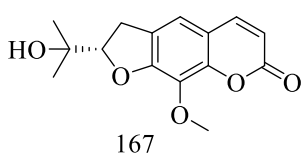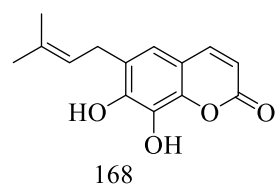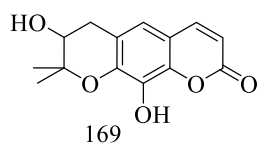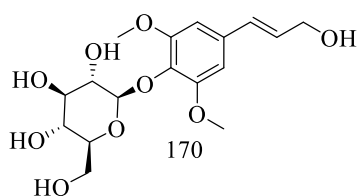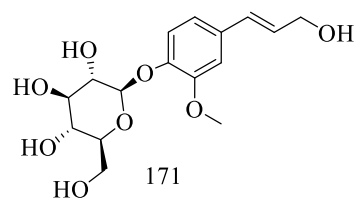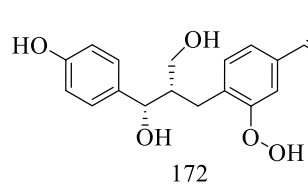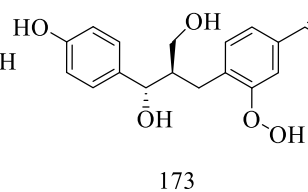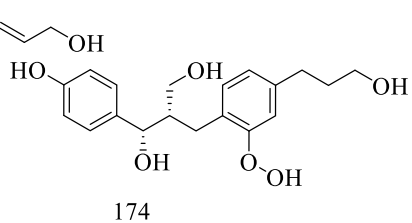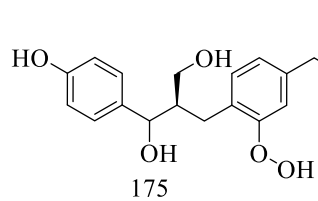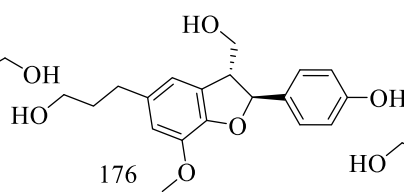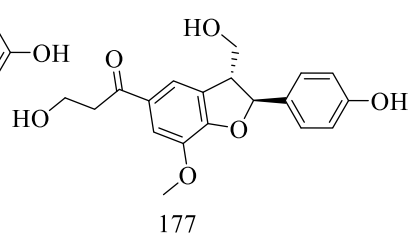

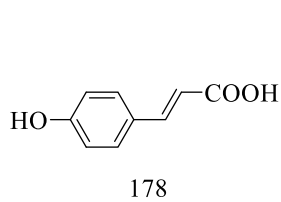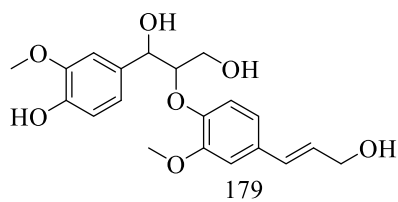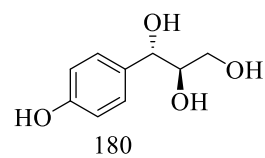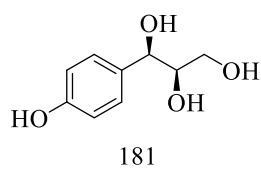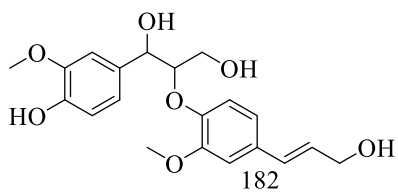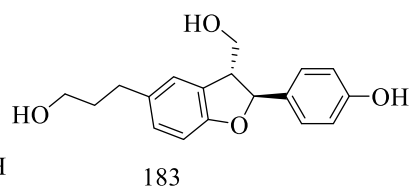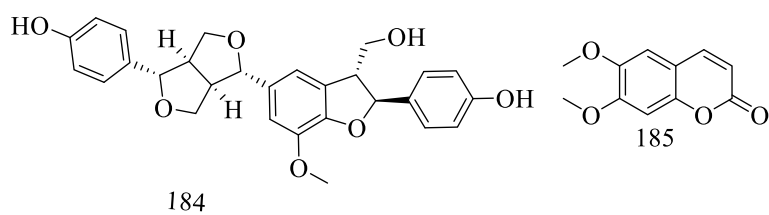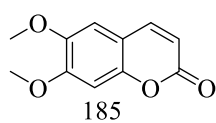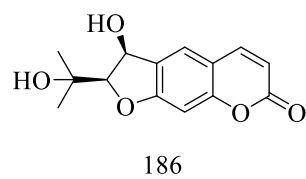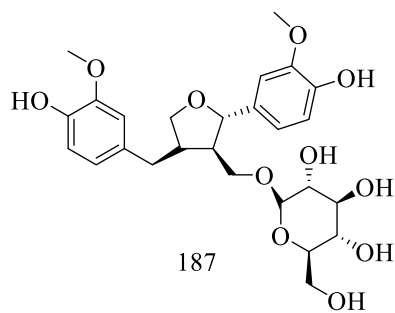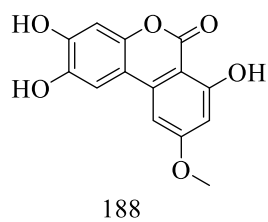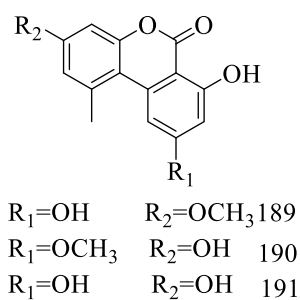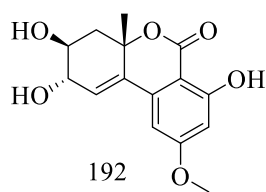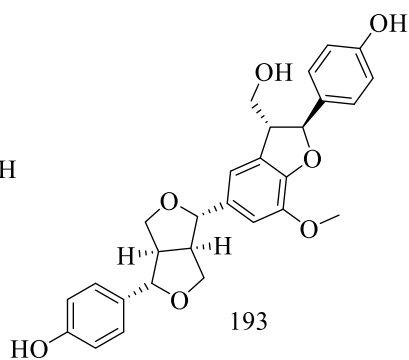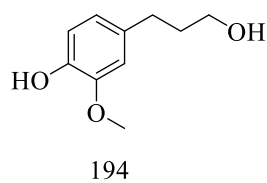

**Figure S3.** Chemical structures of the Polyphenols in *Broussonetia* species.

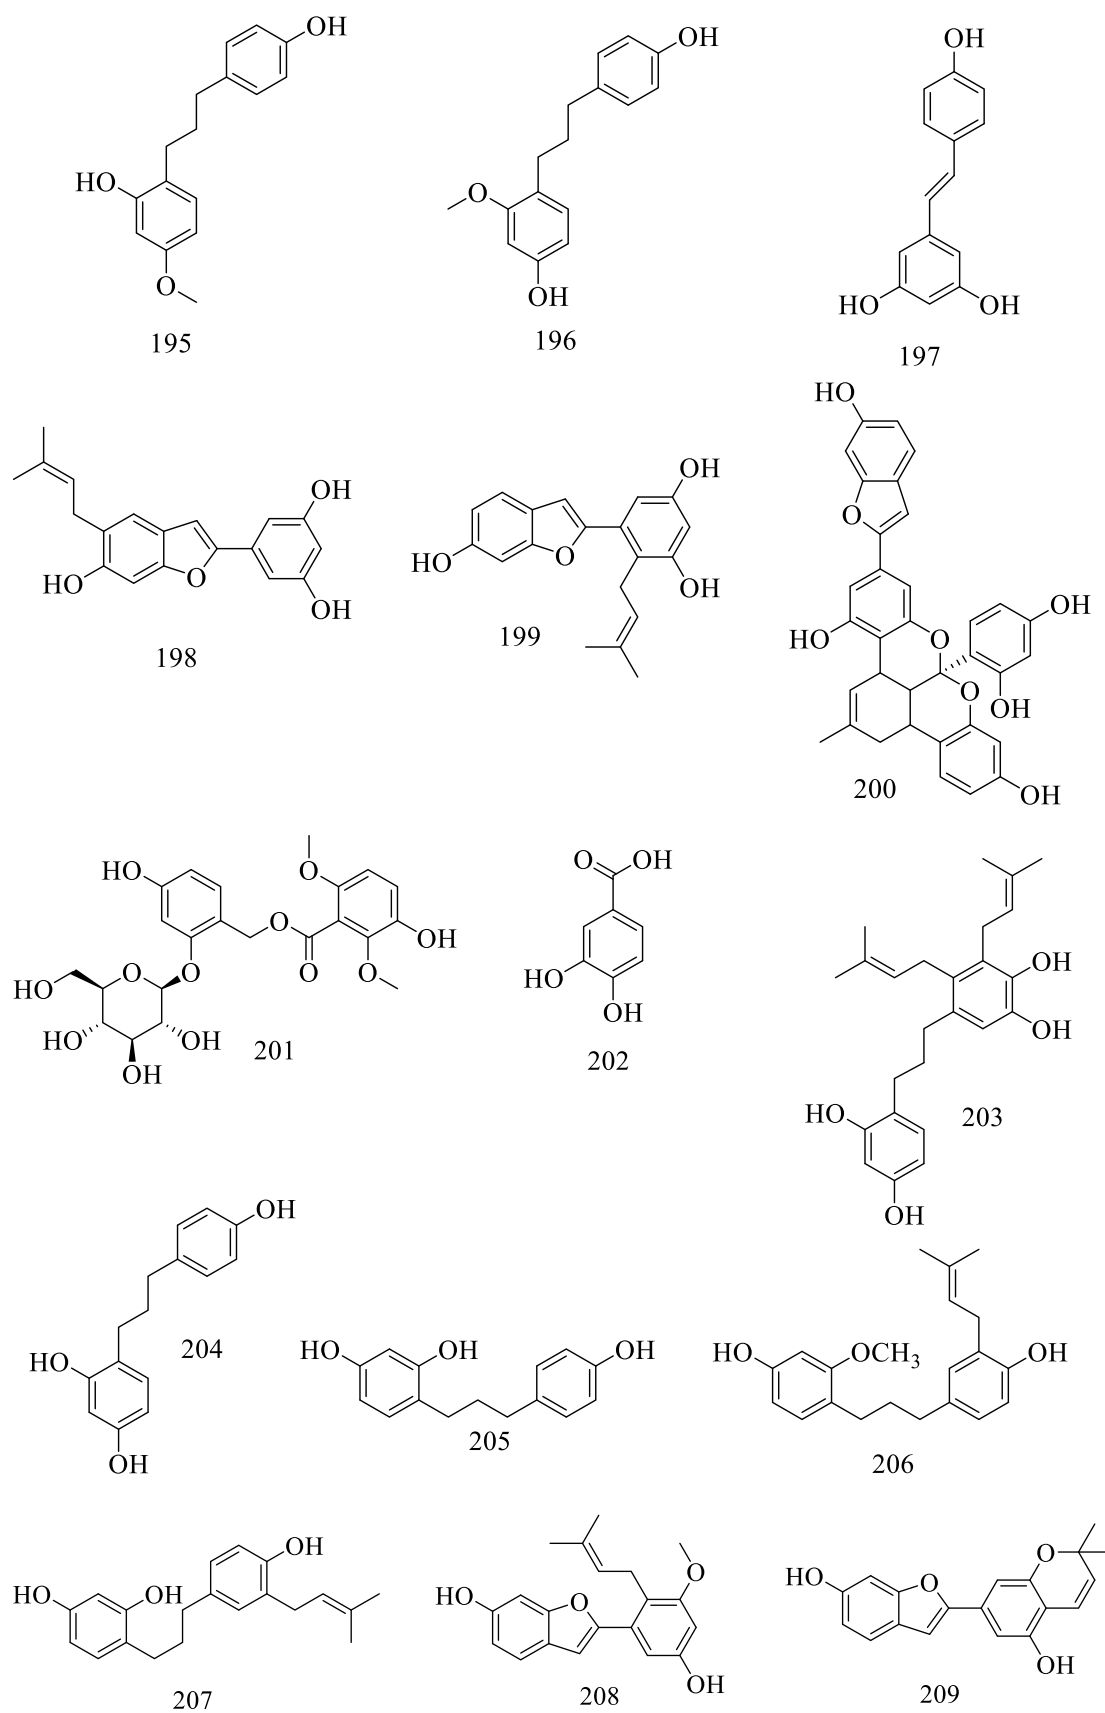

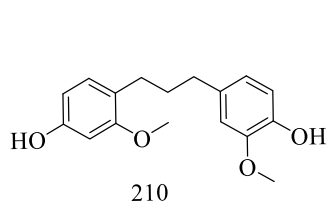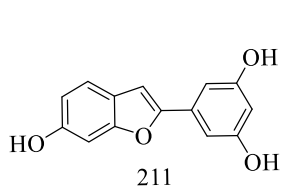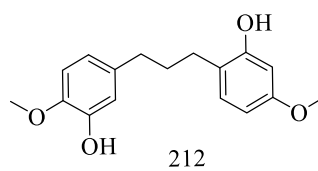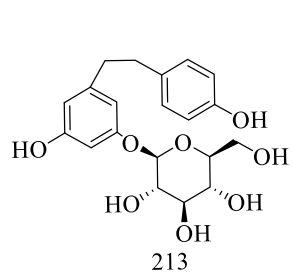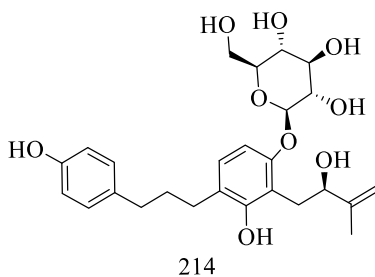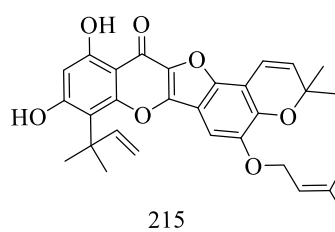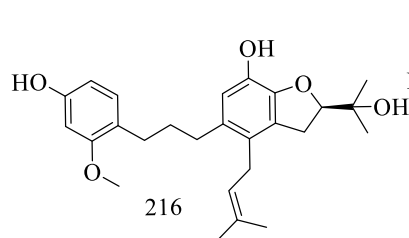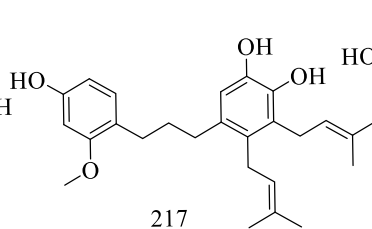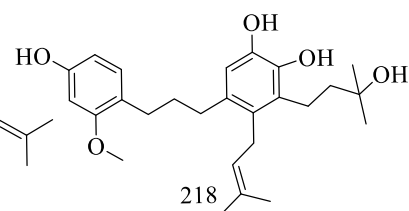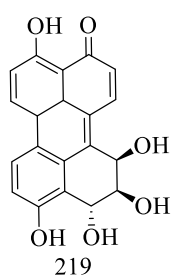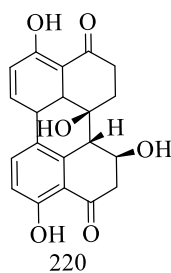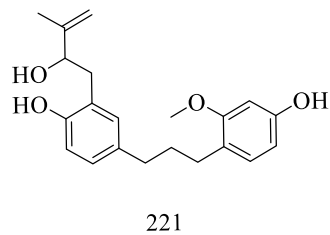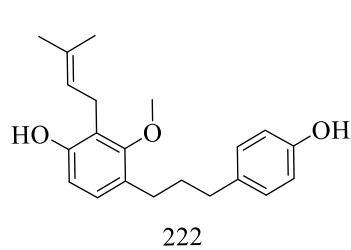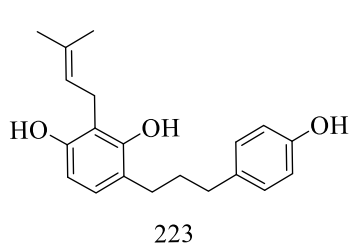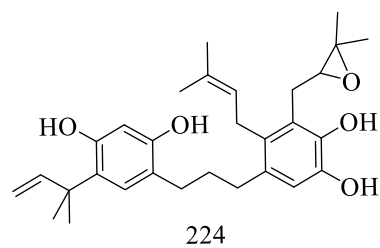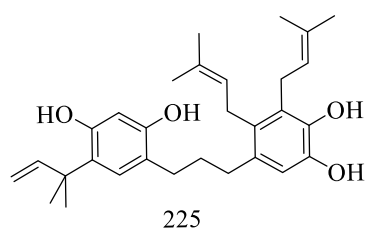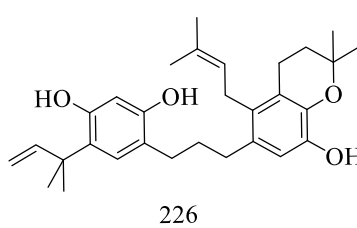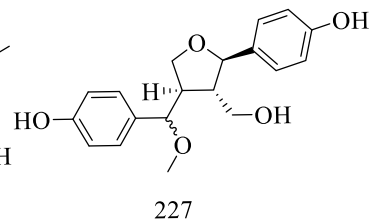

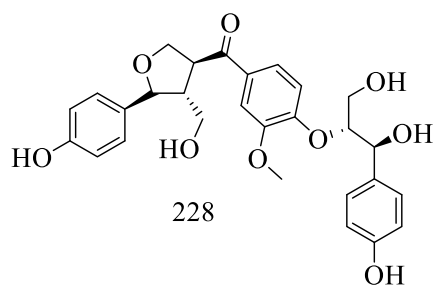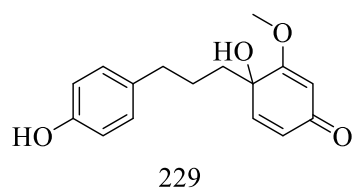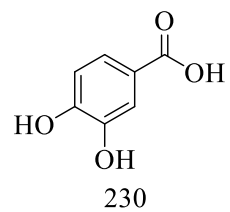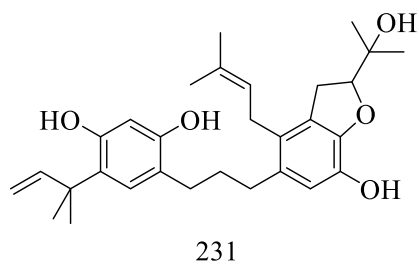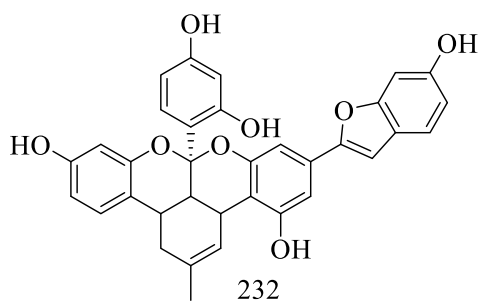

**Figure S4.** Chemical structures of the Alkaloids in *Broussonetia* species.

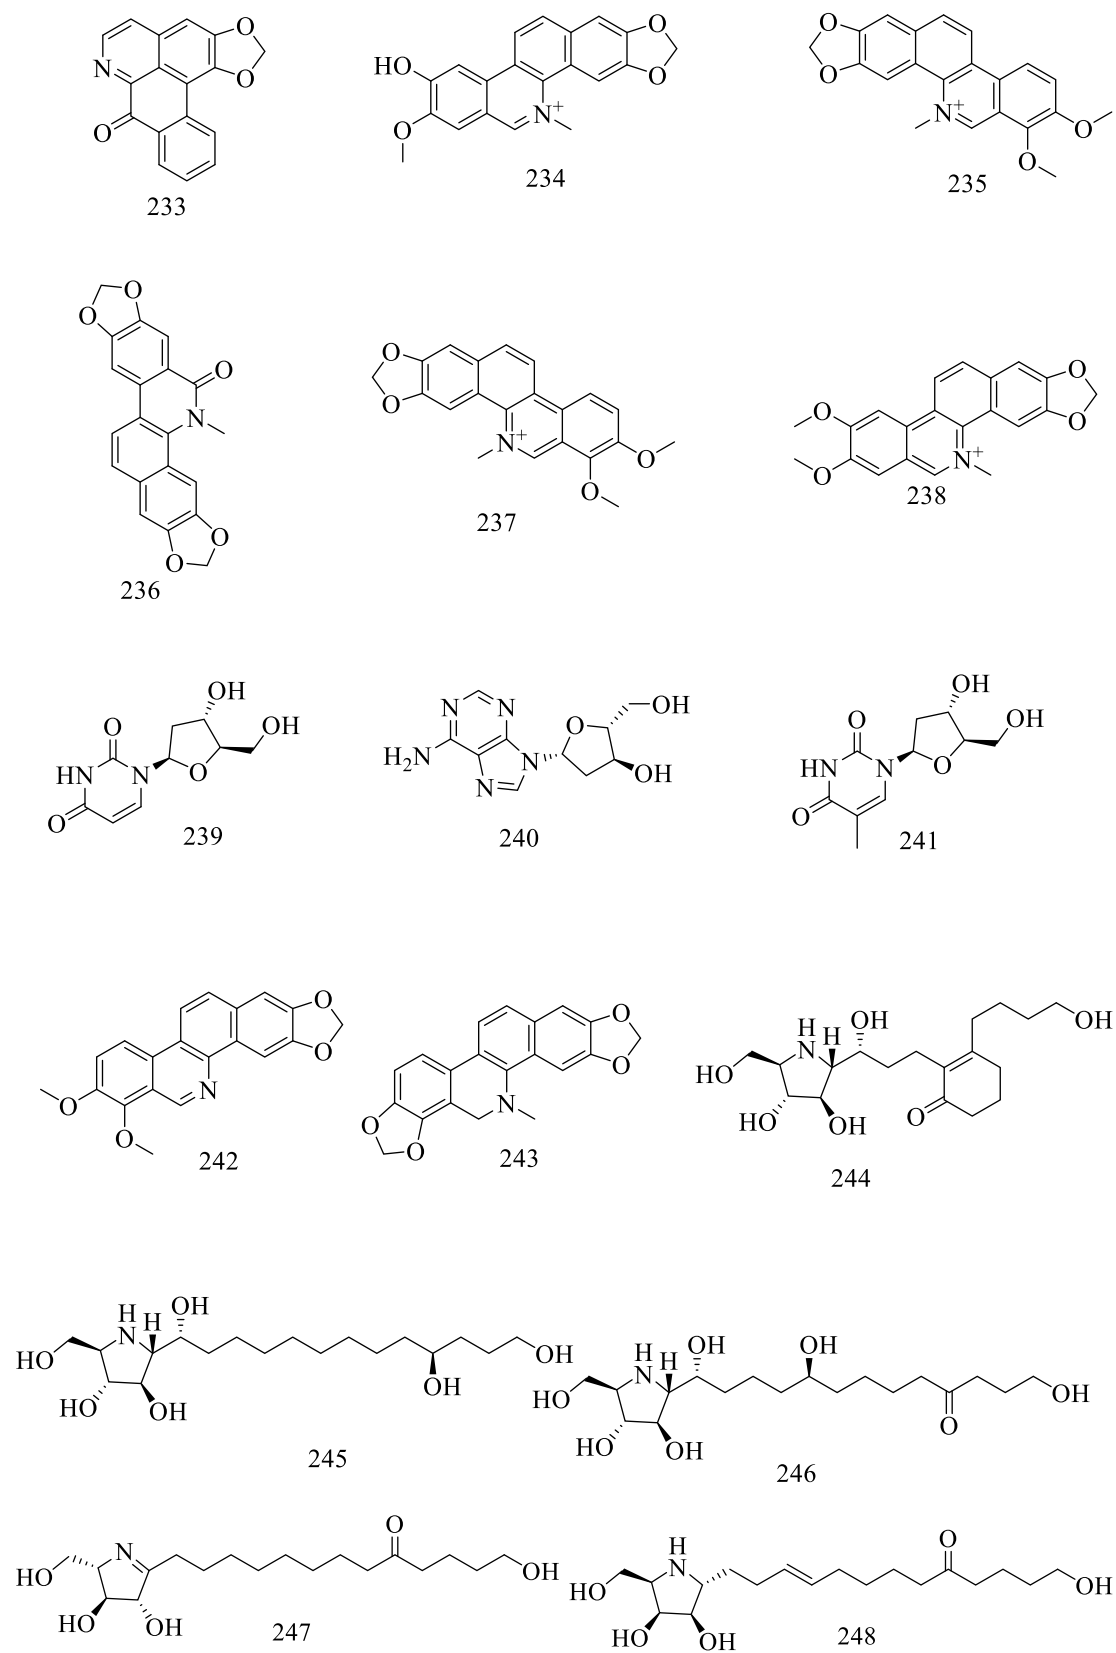



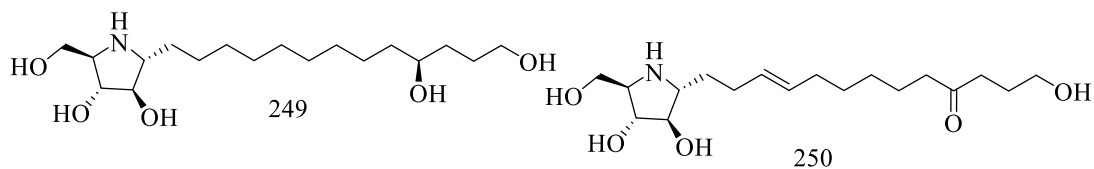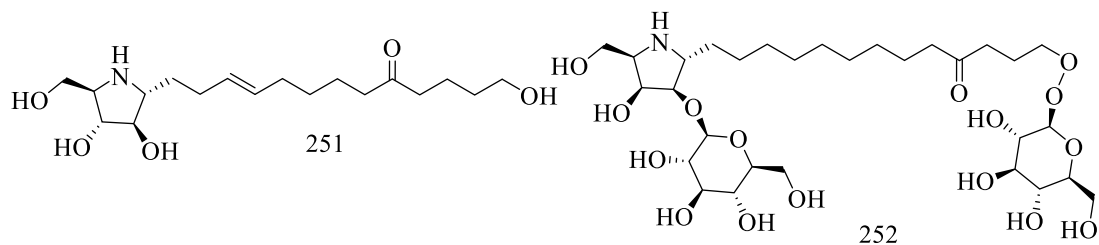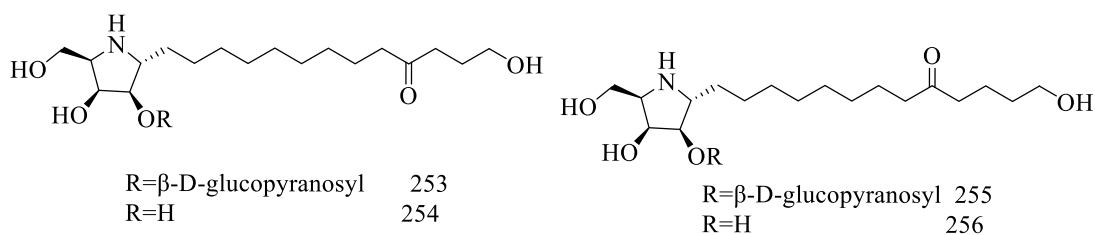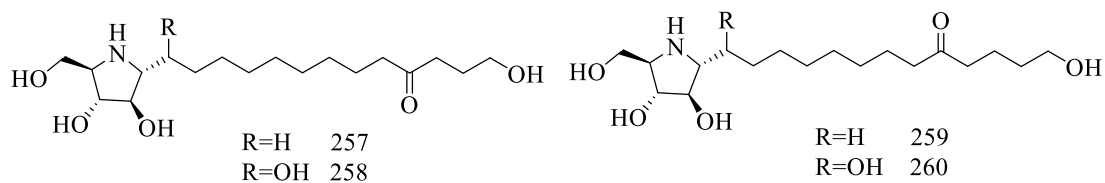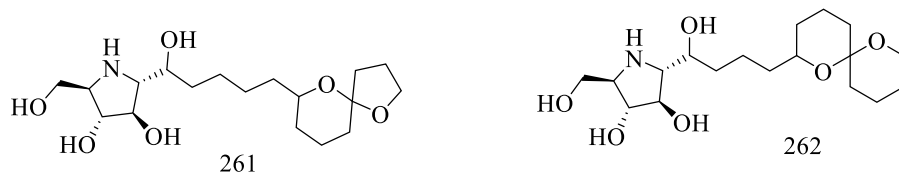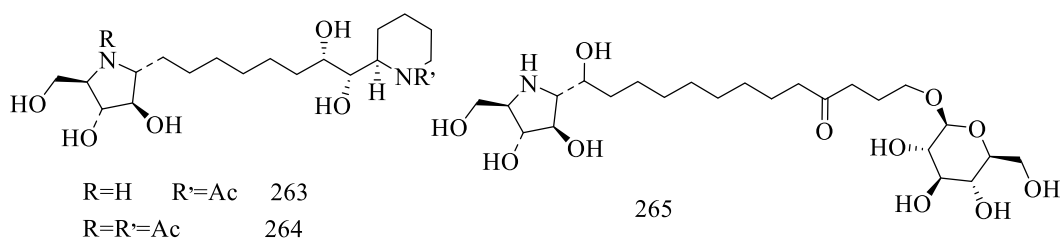

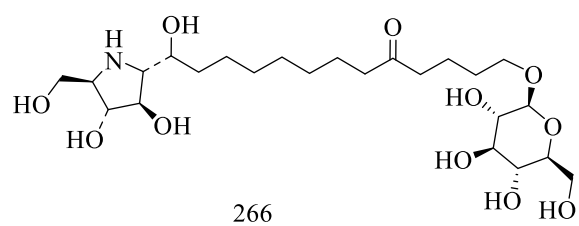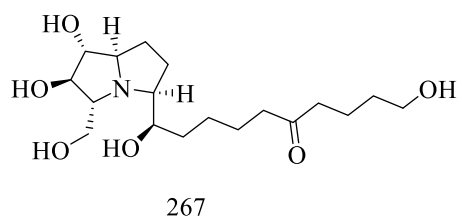

**Figure S5.** Chemical structures of the Terpenoids in *Broussonetia* species.

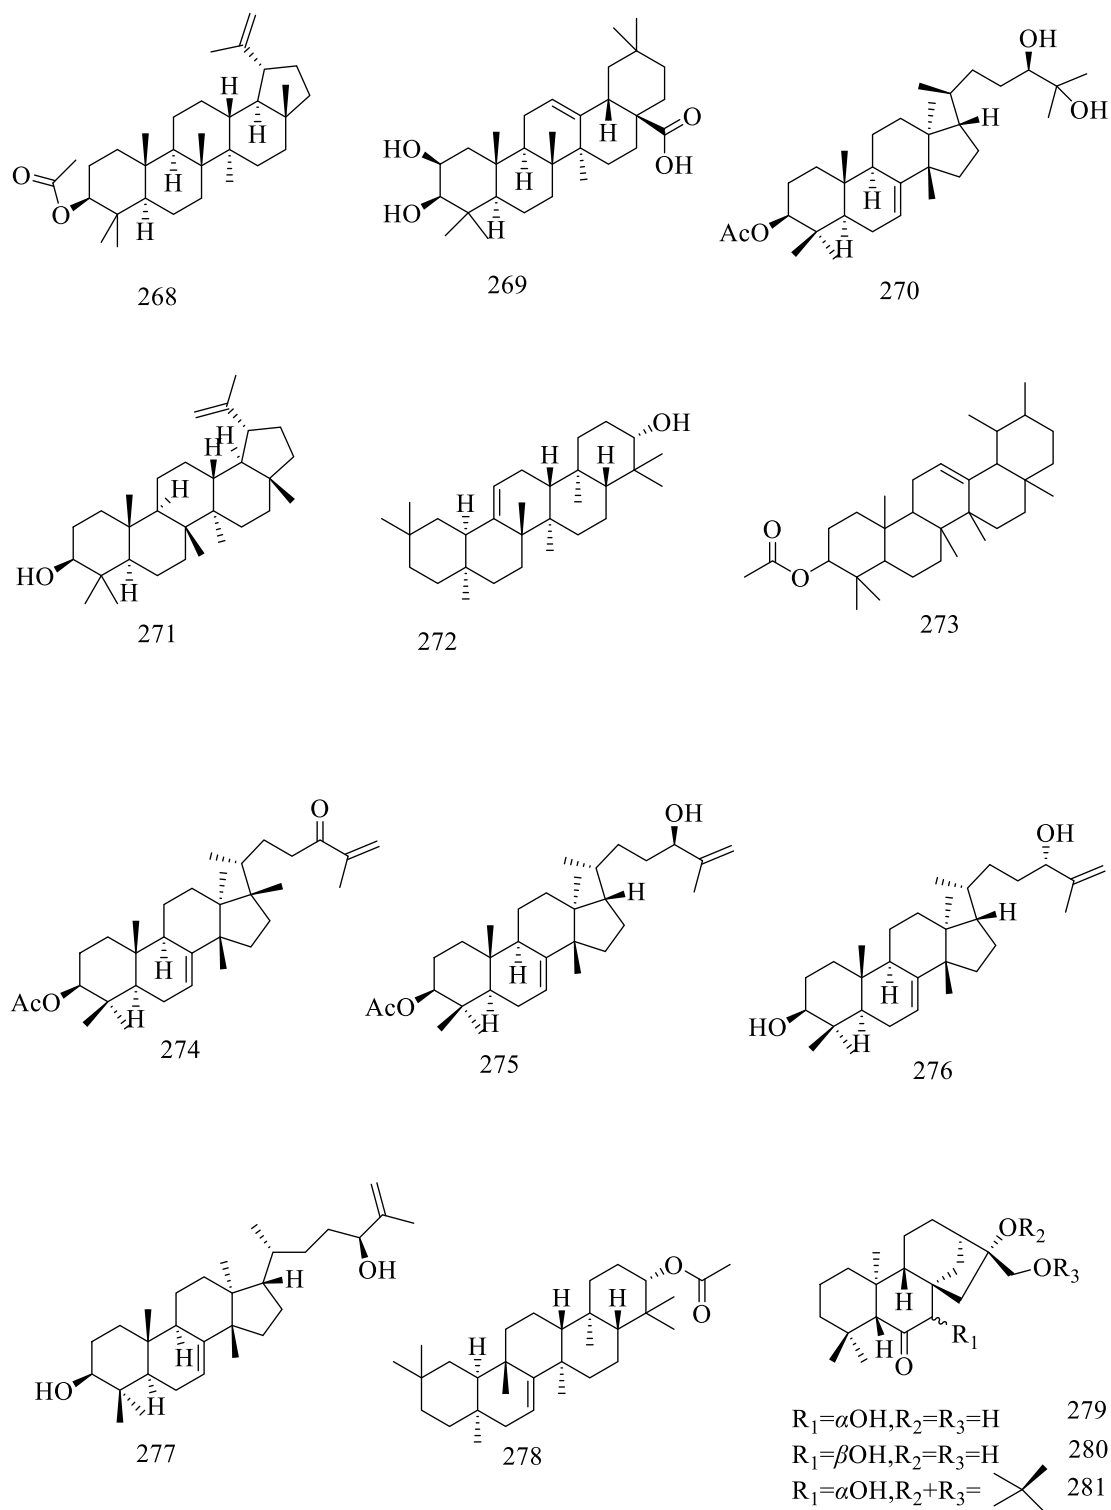

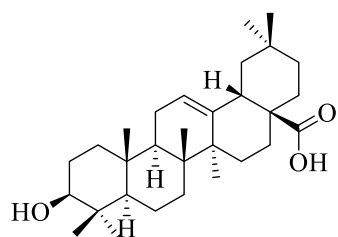

282

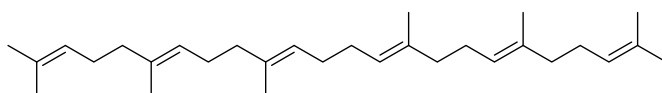

283

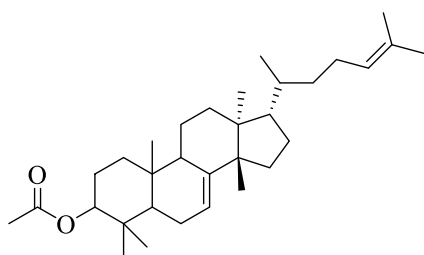

284

**Figure S6.** Chemical structures of the Steroids in *Broussonetia* species.

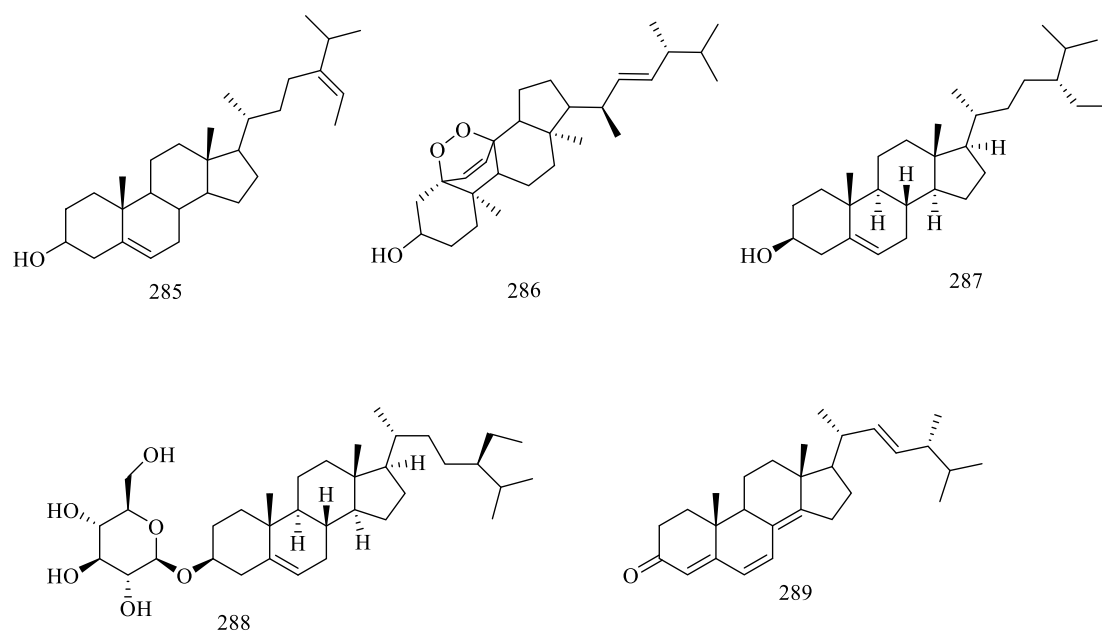

**Figure S7.** Chemical structures of the Others in *Broussonetia* species.

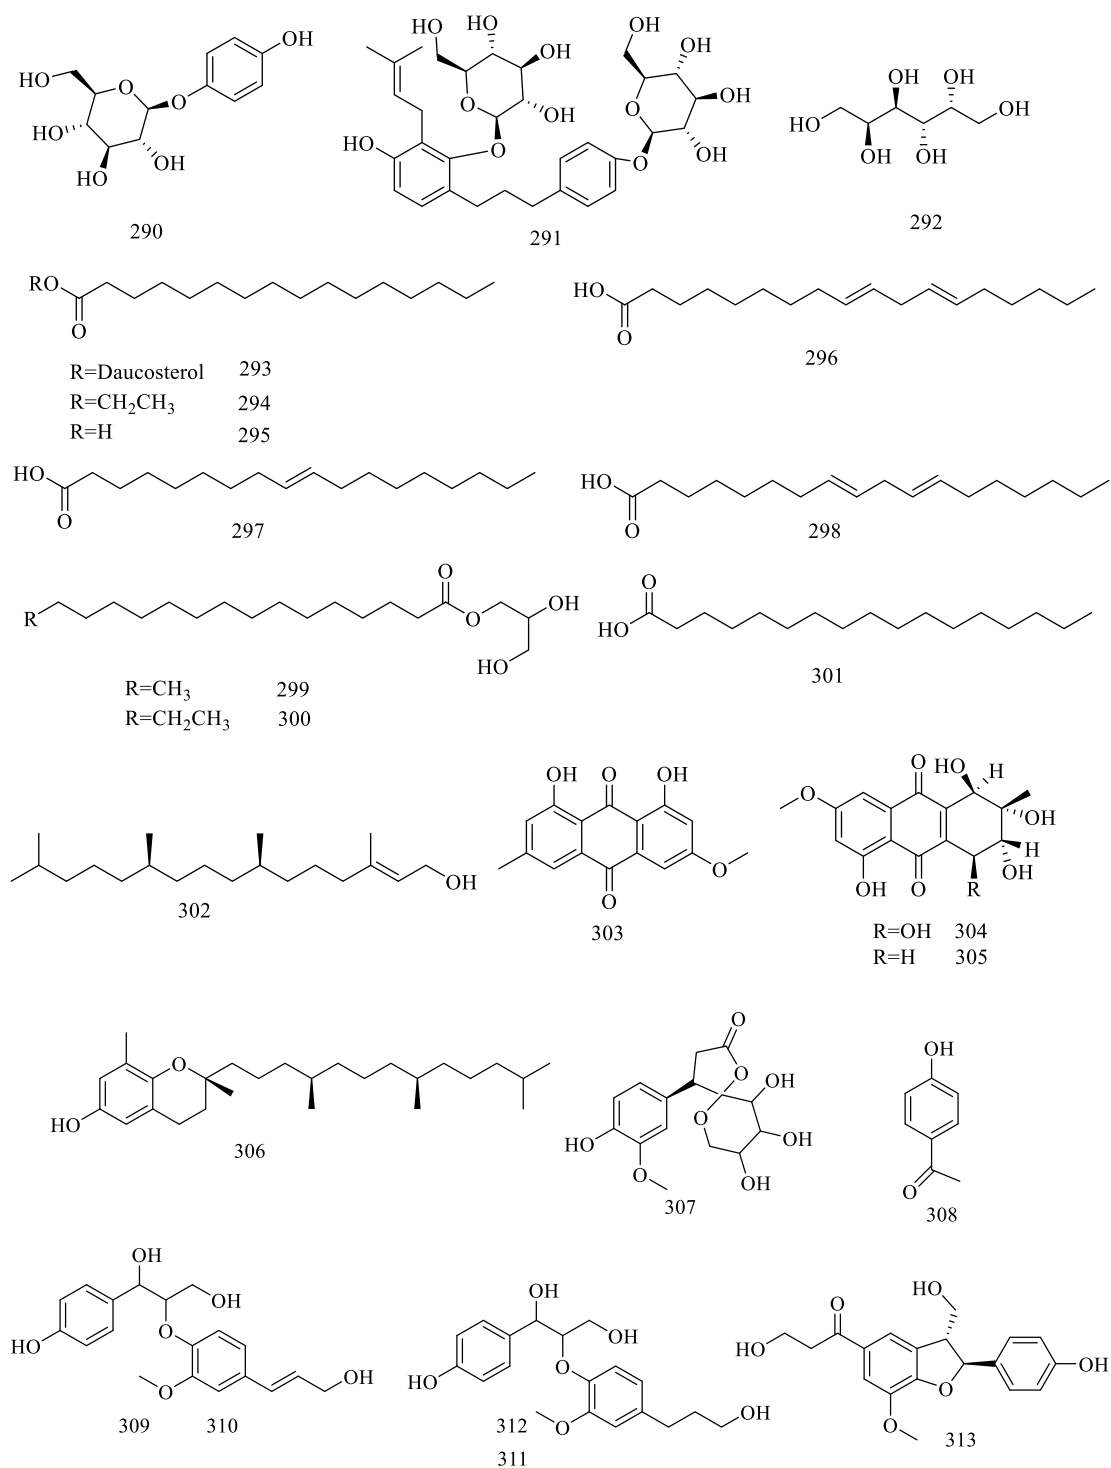

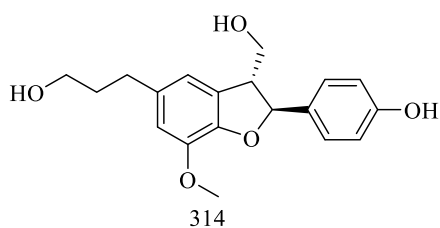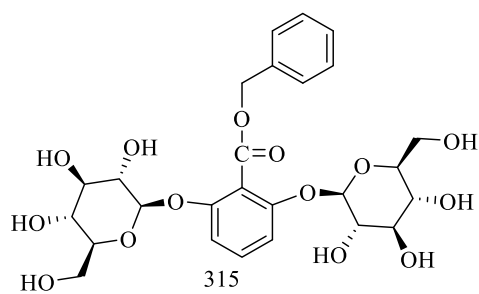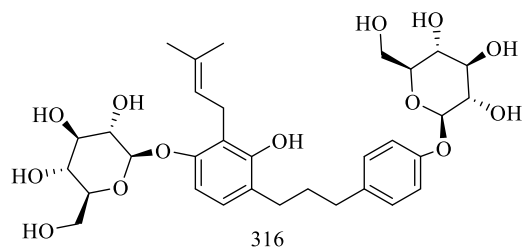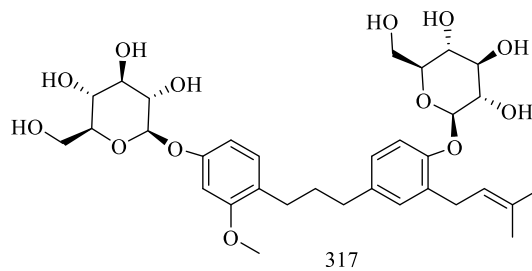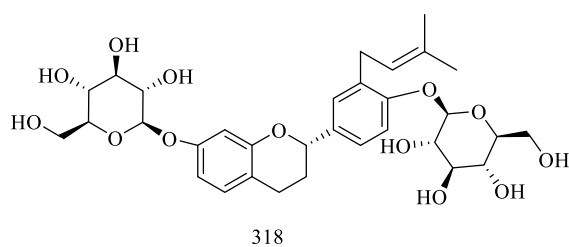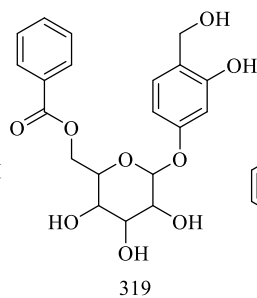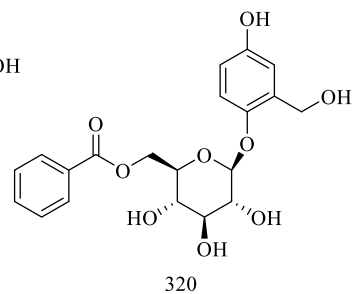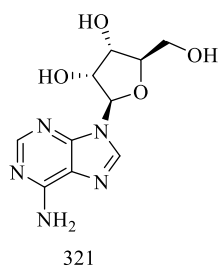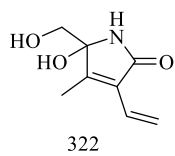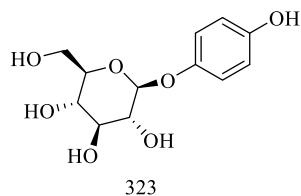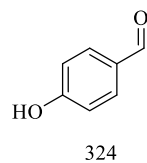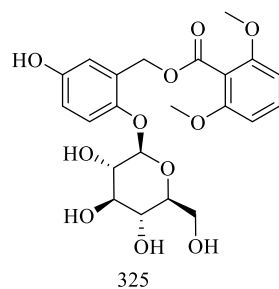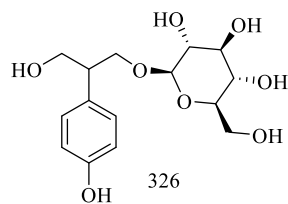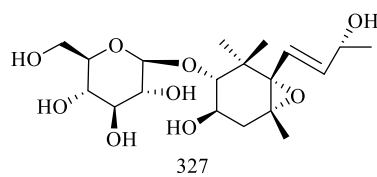

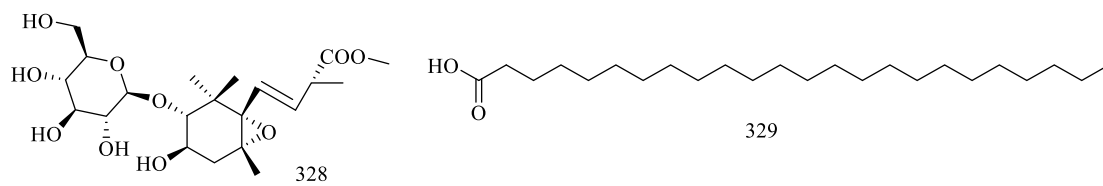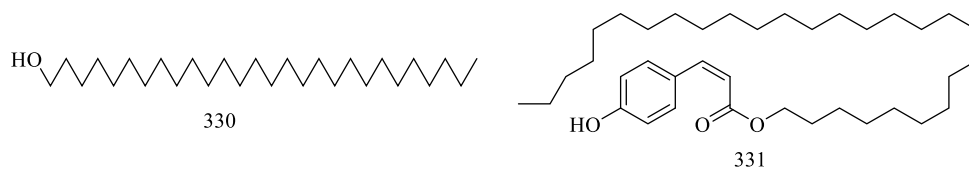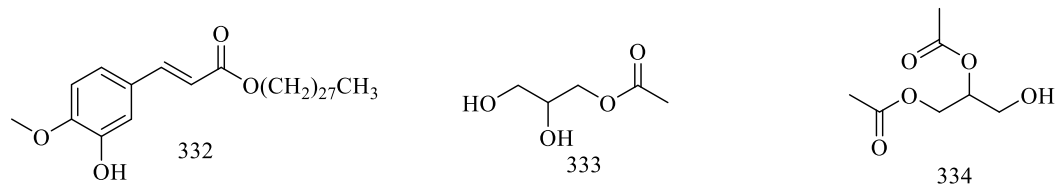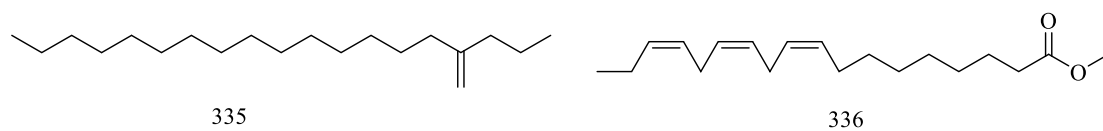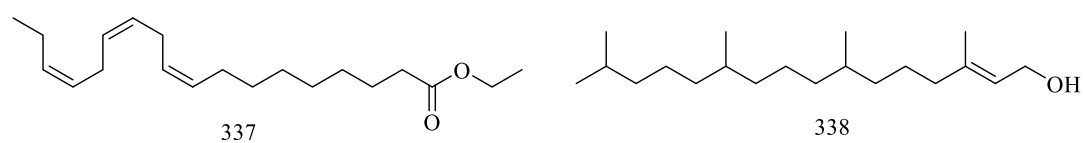

Supplement: s1 [file s1]
